# Supplementary material for: Stat3 Signaling Promotes Survival And Maintenance Of Medullary Thymic Epithelial Cells
Source: PubMed Central journal article supplement (PMC4720390; doi:10.1371/journal.pgen.1005777), 2016-01-20
Supplement: pgen.1005777.s012.pdf [file pgen.1005777.s012.pdf]

**Table S1. qRT-PCR primer sequences**

|                  |                                                                     |
|------------------|---------------------------------------------------------------------|
| <i>Insulin 2</i> | 5'-CCGCTACAATCAAAAACCATCAGCAAG-3'<br>5'-ATCTACAATGCCACGCTTCTGCTGG3' |
| <i>Spt1</i>      | 5'-TCCTTGTGTTGCTTGGTGTTCAC-3'<br>5'-GCATTGGACTCGTCTTCCGTTTCAG-3'    |
| <i>FABP9</i>     | 5'-TGGTTTTCGGTTGTGAATGCCTG-3'<br>5'-TCTTGCTGGTGTCTACCCTTCTGCTAC-3'  |
| <i>GAD67</i>     | 5'-TGACACCGGGGACAAGGCGAT-3'<br>5'-TCTTGGGAGCCACCCTGTGTAGC-3'        |
| <i>iFABP</i>     | 5'-GAGATCATGGCATTTCGACGGCACG-3'<br>5'-TGGTCCAGGCCCCAGTGAGCTC-3'     |
| <i>Aire,</i>     | 5'-TCTGCTAGTCACGACCCTGTTC-3'<br>5'-GCAGGATGCCGTCAAATGAGTG-3'        |
| <i>Bcl2</i>      | 5'-TGTGTGTGGAGAGCGTCAACAG-3'<br>5'-CGGTTTCAGGTAICTCAGTCATCCAC-3'.   |
